# Supplementary material for: Cataleptogenic Effect of Haloperidol Formulated in Water-Soluble Calixarene-Based Nanoparticles
Source: MDPI journal article supplement (doi:10.3390/pharmaceutics15030921), 2023-03-11
Supplement: s1 [file s1]

Supplementary Materials

# Cataleptogenic Effect of Haloperidol Formulated in Water-Soluble Calixarene-Based Nanoparticles

Nadezda E. Kashapova <sup>1,\*</sup>, Ruslan R. Kashapov <sup>1,\*</sup>, Albina Y. Ziganshina <sup>1</sup>, Dmitry O. Nikitin <sup>2</sup>, Irina I. Semina <sup>2</sup>, Vadim V. Salnikov <sup>3</sup>, Vitaliy V. Khutoryanskiy <sup>4</sup>, Rouslan I. Moustafine <sup>5</sup> and Lucia Y. Zakharova <sup>1</sup>

<sup>1</sup> Arbuzov Institute of Organic and Physical Chemistry, FRC Kazan Scientific Center of RAS, 8 Arbuzov Str., 420088 Kazan, Russia

<sup>2</sup> Department of Pharmacology, Kazan State Medical University, 49 Butlerov Str., 420012 Kazan, Russia

<sup>3</sup> Kazan Institute of Biochemistry and Biophysics, FRC Kazan Scientific Center of RAS, 2/31 Lobachevsky Str., 420111 Kazan, Russia

<sup>4</sup> School of Pharmacy, University of Reading, Whiteknights, Reading, RG66DX, United Kingdom

<sup>5</sup> Institute of Pharmacy, Kazan State Medical University, 16 Fatykh Amirkhan Str., 420126 Kazan, Russia

\* Correspondence: kashapov@iopc.ru (R.R.K); kashapova.nadya@gmail.com (N.E.K)

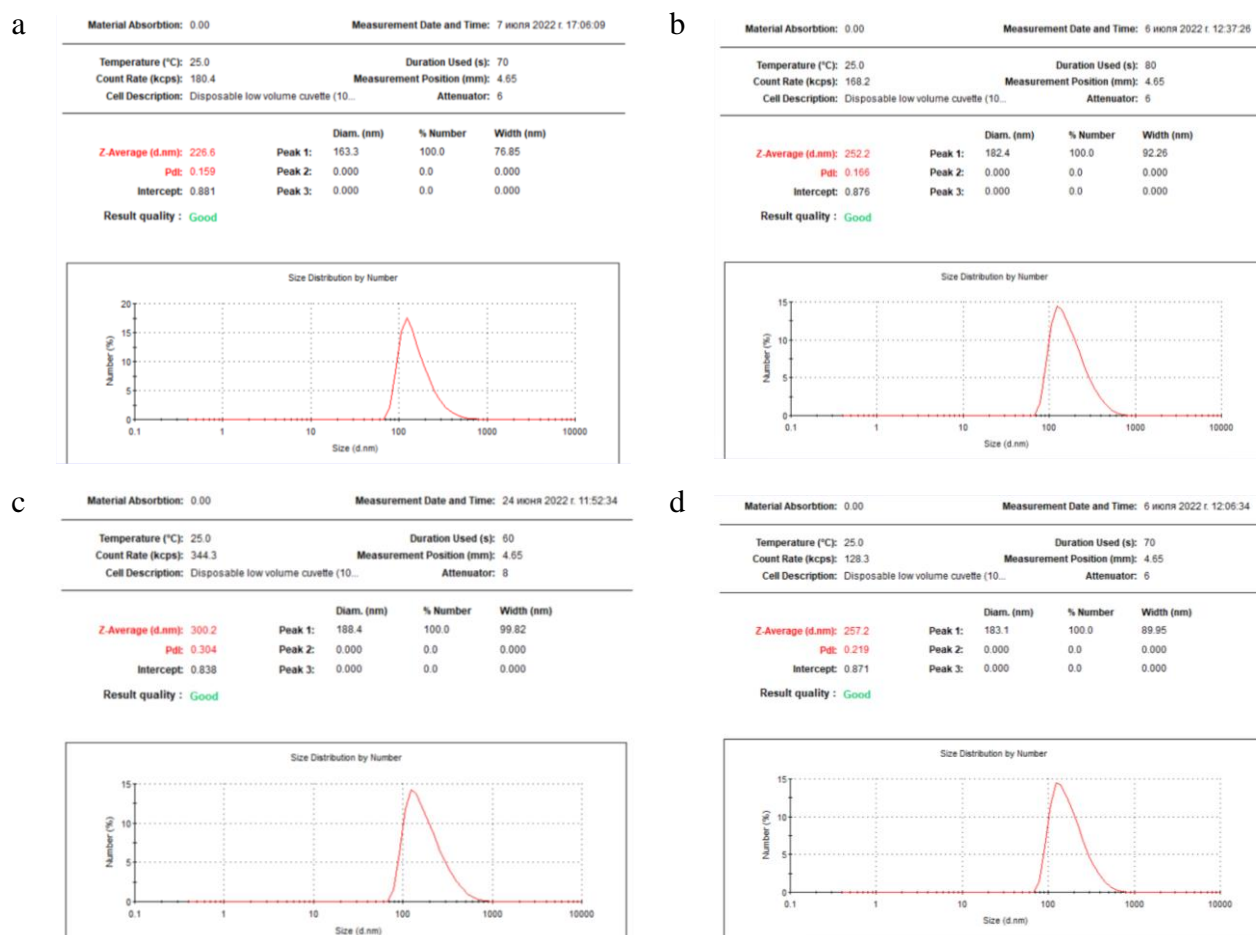

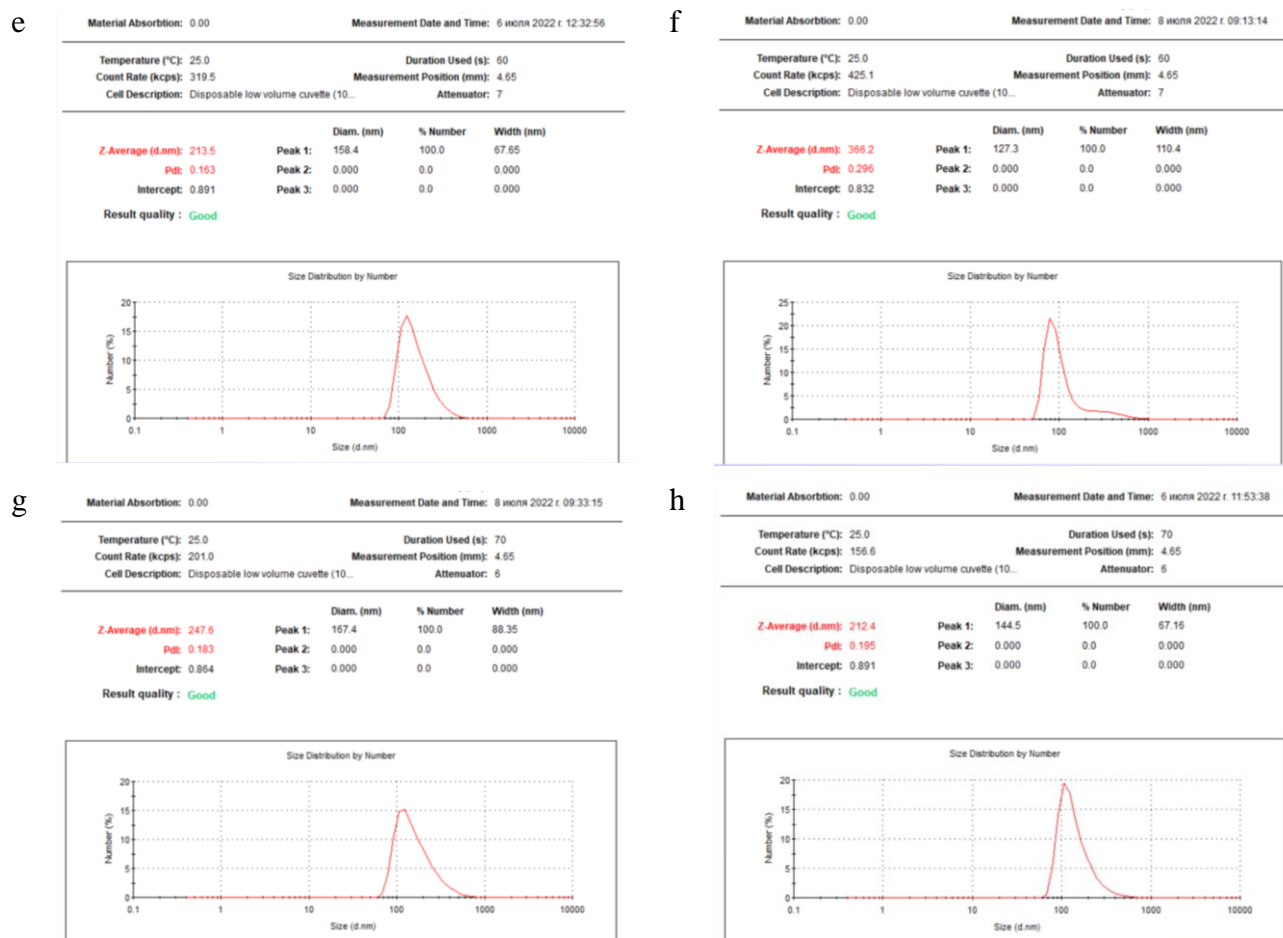

**Figure S1.** Particle size distribution by number in aqueous solutions of **VC10-Hal** (1:1) at concentration of 0.025 mM (a), 0.05 mM (b), 0.075 mM (c), 0.1 mM (d), 0.15 mM (e), 0.2 mM (f), 0.25 mM (g), 0.3 mM (h).

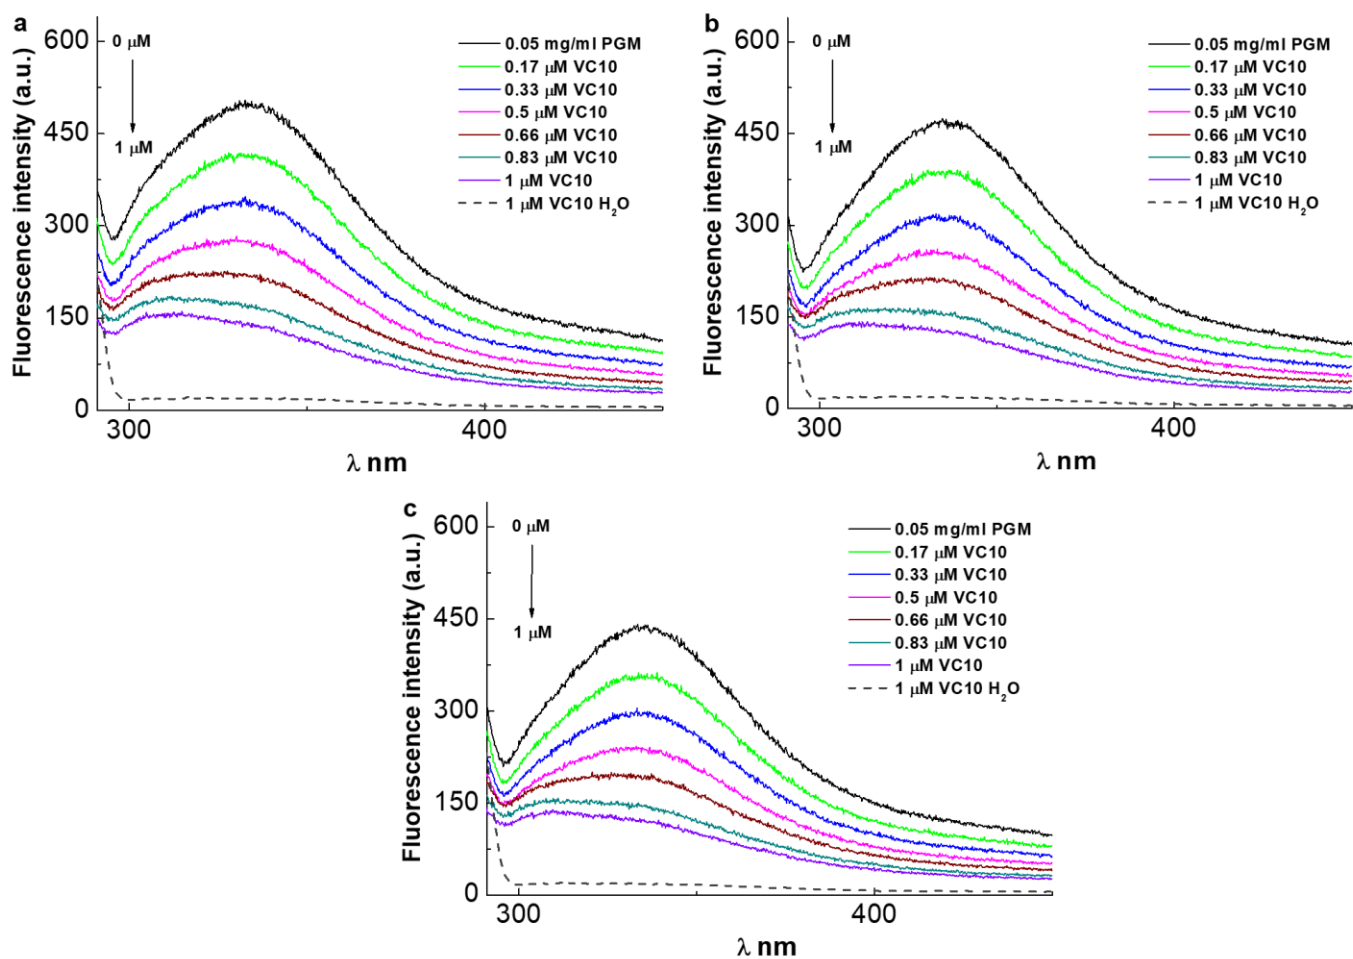

**Figure S2.** Steady state fluorescence spectra of PGM at a constant concentration of 0.05 mg/mL in the presence of VC10 at 298 K (a), 304 K (b), 310 K (c).

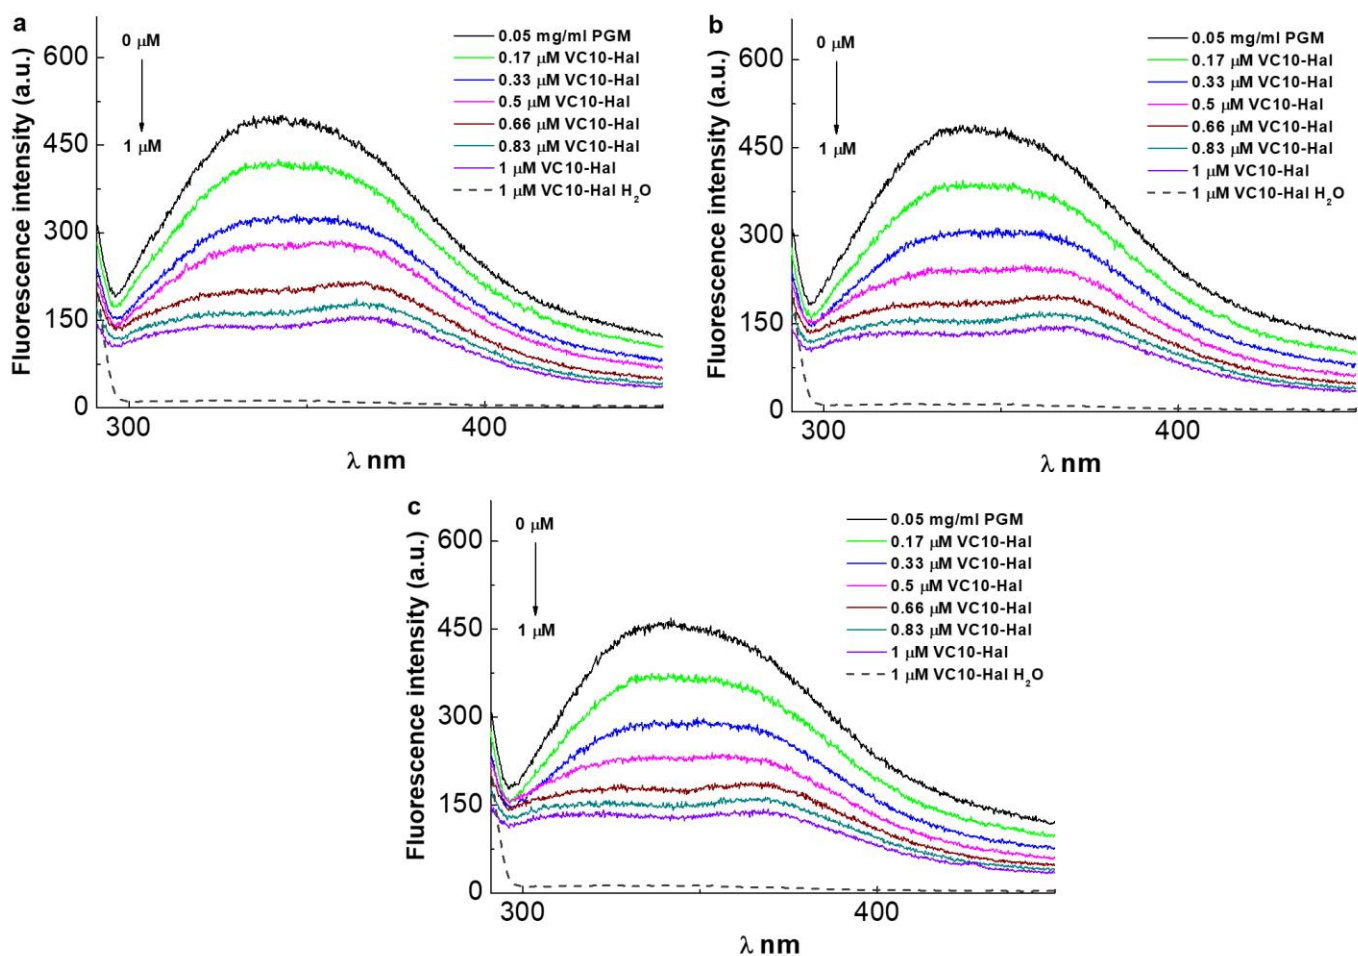

**Figure S3.** Steady state fluorescence spectra of PGM at a constant concentration of 0.05 mg/mL in the presence of VC10-Hal (1:1) at 298 K (a), 304 K (b), 310 K (c).

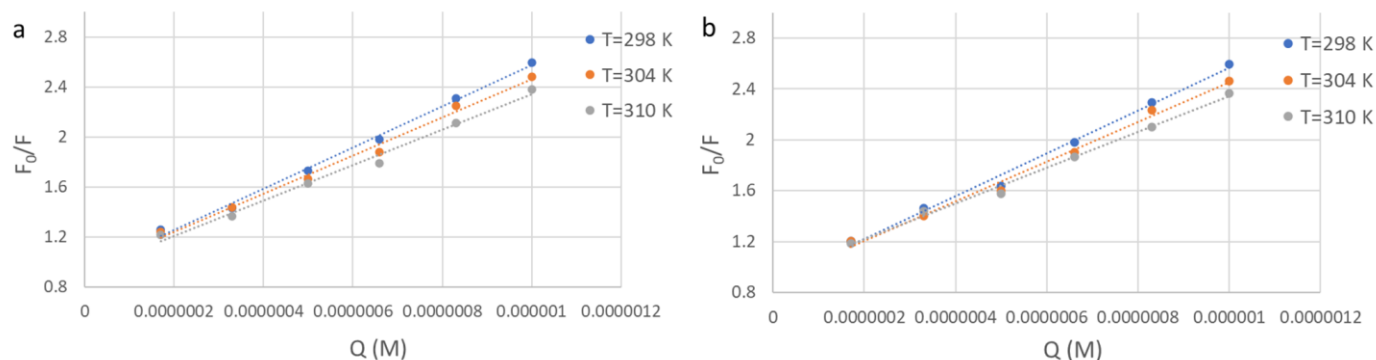

**Figure S4.** Stern-Volmer plots for fluorescence quenching of PGM by VC10 (a), by VC10-Hal (b) at 298 K, 304 K, 310 K.

**Table S1.** Effect of viologen decyl calix[4]resorcinol VC10 on the research activity of mice in the "Open field" test. (VC10 in a dose of 1/100 of the LD<sub>50</sub> and 1/50 of the LD<sub>50</sub>, intraperitoneally administration, n=8).

| Number of holes examined | Number of holes examined, % | Group                        |
|--------------------------|-----------------------------|------------------------------|
| 48,5±17,96               | 100±37,03                   | Control                      |
| 19,5±0,76                | 40,21±1,57                  | VC10, 1/100 LD <sub>50</sub> |
| 21,83±0,91               | 45,02±1,88                  | VC10, 1/50 LD <sub>50</sub>  |

**Table S2.** Effect of viologen decyl calix[4]resorcinol **VC10** on the motor activity of mice in the "Open field" test. (**VC10** in a dose of 1/100 of the LD<sub>50</sub> and 1/50 of the LD<sub>50</sub>, intraperitoneally administration, n=8).

| Number of crossed lines | Number of crossed lines, % | Group                                |
|-------------------------|----------------------------|--------------------------------------|
| 77,83±23,37             | 100±30,03                  | Control                              |
| 55±6,79                 | 70,66±8,72                 | <b>VC10</b> , 1/100 LD <sub>50</sub> |
| 76,83±10,17             | 98,72±13,06                | <b>VC10</b> , 1/50 LD <sub>50</sub>  |

**Table S3.** Effect of viologen decyl calix[4]resorcinol **VC10** on the the number of entrances to the center of mice in the "Open field" test. (**VC10** in a dose of 1/100 of the LD<sub>50</sub> and 1/50 of the LD<sub>50</sub>, intraperitoneally administration, n=8).

| Number of entrances to the center | Number of entrances to the center, % | Group                                |
|-----------------------------------|--------------------------------------|--------------------------------------|
| 3,67±1,41                         | 100±38,35                            | Control                              |
| 2,33±0,67                         | 63,64±18,18                          | <b>VC10</b> , 1/100 LD <sub>50</sub> |
| 3,67±0,61                         | 100±16,76                            | <b>VC10</b> , 1/50 LD <sub>50</sub>  |
